# Supplementary material for: The Assessment of the Groundwater Quality in the Coastal Aquifers of the Essaouira Basin, Southwestern Morocco, Using Hydrogeochemistry and Isotopic Signatures
Source: MDPI journal article supplement (doi:10.3390/w15091769), 2023-05-05
Supplement: s1 [file s1]

# Supplementary Materials

## Supplementary Table:

**Table S1.** Results of the physico-chemical parameters of all campaign (2017. 2018. 2019. and 2020) in the coastal zone of Essaouira basin in the Hauterivian aquifer.

| Sample        | H     | pH  | T    | EC        | Ca <sup>2+</sup> | Mg <sup>2+</sup> | Na <sup>+</sup> | K <sup>+</sup> | HCO <sub>3</sub> <sup>-</sup> | Cl <sup>-</sup> | SO <sub>4</sub> <sup>2-</sup> | NO <sub>3</sub> <sup>-</sup> | WQI   | IWQI | BI   |
|---------------|-------|-----|------|-----------|------------------|------------------|-----------------|----------------|-------------------------------|-----------------|-------------------------------|------------------------------|-------|------|------|
|               |       |     | °C   | μS/cm     | mg/L             |                  |                 |                |                               |                 |                               |                              |       |      | %    |
| Campaign 2017 |       |     |      |           |                  |                  |                 |                |                               |                 |                               |                              |       |      |      |
| 191/51        | -     | 7.2 | 24   | 1661      | 128.3            | 65.6             | 108.1           | 3.9            | 506.5                         | 326.1           | 100.9                         | 18.6                         | 109.6 | 56.3 | -9   |
| P9            | -     | 7.4 | 24.3 | 1685      | 122.2            | 89.9             | 112.7           | 7.8            | 457.7                         | 340.3           | 163.4                         | 12.4                         | 111.1 | 56.7 | -5   |
| 163/51        | 154.4 | 7.2 | 23.3 | 1165      | 106.2            | 70.5             | 75.9            | 7.8            | 335.6                         | 141.8           | 249.8                         | 6.2                          | 86.5  | 71.5 | -1   |
| HT24          | 117.4 | 7.9 | 19.4 | 1641      | 118.2            | 99.7             | 131.0           | 7.8            | 414.9                         | 397.0           | 197.0                         | 6.2                          | 110.4 | 51.7 | -5   |
| HT25          | -     | 6.9 | 24   | 1787      | 122.2            | 91.2             | 117.2           | 7.8            | 494.3                         | 368.7           | 120.1                         | 12.4                         | 113.7 | 33.0 | -6   |
| HT26          | -     | 7.2 | 24.8 | 1681      | 128.3            | 80.2             | 108.1           | 7.8            | 408.8                         | 382.9           | 148.9                         | 6.2                          | 105.9 | 47.2 | -7   |
| HT27          | 146.1 | 7.1 | 22.1 | 1518      | 132.3            | 94.8             | 96.6            | 7.8            | 445.4                         | 326.1           | 120.1                         | 12.4                         | 105.6 | 59.1 | -1   |
| HT28          | -     | 7.2 | 24.6 | 1751      | 114.2            | 105.7            | 119.5           | 11.7           | 482.1                         | 354.5           | 187.4                         | 12.4                         | 117.4 | 45.2 | -5   |
| HT29          | -     | 8.4 | 23   | 1134      | 136.3            | 59.6             | 50.6            | 7.8            | 244.1                         | 127.6           | 345.9                         | 6.2                          | 85.9  | 77.5 | -3   |
| HT101         | 123.1 | 7.8 | 21.3 | 2130      | 144.3            | 178.7            | 133.3           | 7.8            | 506.5                         | 425.4           | 514.1                         | 6.2                          | 145.8 | 40.9 | -5   |
| HT102         | 148.4 | 7.2 | 21.5 | 1509      | 124.2            | 74.1             | 112.7           | 7.8            | 469.9                         | 354.5           | 139.3                         | 6.2                          | 105.9 | 46.7 | -9   |
| HT103         | -     | 7   | 22.9 | 1554      | 112.2            | 71.7             | 110.4           | 7.8            | 518.7                         | 312.0           | 115.3                         | 12.4                         | 108.0 | 55.8 | -9   |
| HT104         | -     | 6.9 | 22.9 | 2203      | 158.3            | 92.4             | 216.1           | 7.8            | 506.5                         | 638.1           | 57.7                          | 18.6                         | 134.4 | 26.5 | -5   |
|               | Min   | 6.9 | 19.4 | 1134      | 106.2            | 59.6             | 50.6            | 3.9            | 244.1                         | 127.6           | 57.7                          | 6.2                          | 85.9  | 26.5 | -9   |
|               | Max   | 8.4 | 24.8 | 2203      | 158.3            | 178.7            | 216.1           | 11.7           | 518.7                         | 638.1           | 514.1                         | 18.6                         | 145.8 | 77.5 | -1   |
|               | Moy   | 7.3 | 22.9 | 1647.6154 | 126.7            | 90.3             | 114.8           | 7.8            | 445.4                         | 345.8           | 189.2                         | 10.5                         | 110.8 | 51.4 | -5.4 |
| Campaign 2018 |       |     |      |           |                  |                  |                 |                |                               |                 |                               |                              |       |      |      |
| 163/51        | 153.4 | 7.3 | 22.1 | 1221      | 118.6            | 60.3             | 54.7            | 5.7            | 323.4                         | 113.6           | 227.7                         | 4.1                          | 79.6  | 74.7 | 0.0  |

| Sample        | H          | pH  | T          | EC         | Ca <sup>2+</sup> | Mg <sup>2+</sup> | Na <sup>+</sup> | K <sup>+</sup> | HCO <sub>3</sub> <sup>-</sup> | Cl <sup>-</sup> | SO <sub>4</sub> <sup>2-</sup> | NO <sub>3</sub> <sup>-</sup> | WQI   | IWQI | BI   |
|---------------|------------|-----|------------|------------|------------------|------------------|-----------------|----------------|-------------------------------|-----------------|-------------------------------|------------------------------|-------|------|------|
|               |            |     | °C         | μS/cm      | mg/L             |                  |                 |                |                               |                 |                               |                              |       |      | %    |
| P9            | -          | 7.4 | 23.9       | 1787       | 121.8            | 81.6             | 110.9           | 4.5            | 445.4                         | 326.6           | 139.2                         | 6.0                          | 101.5 | 56.9 | -5.0 |
| HT24          | 117.5      | 8   | 18.3       | 1754       | 115.4            | 81.6             | 96.2            | 6.4            | 427.1                         | 255.6           | 166.2                         | 7.4                          | 99.8  | 59.5 | -3.0 |
| HT25          | -          | 7.1 | 24         | 1991       | 153.9            | 89.4             | 102.1           | 5.2            | 549.1                         | 411.8           | 114.6                         | 10.7                         | 117.1 | 35.8 | -8.0 |
| HT26          | -          | 7.3 | 24.3       | 1803       | 157.1            | 66.1             | 105.0           | 3.4            | 390.5                         | 340.8           | 144.1                         | 5.0                          | 99.1  | 58.2 | -3.0 |
| HT28          | -          | 7.2 | 23.6       | 1897       | 117.0            | 96.2             | 116.9           | 8.4            | 475.9                         | 340.8           | 171.1                         | 10.0                         | 110.4 | 55.2 | -5.0 |
| HT29          | -          | 8.1 | 18.1       | 1094       | 120.2            | 61.2             | 57.7            | 4.9            | 225.8                         | 127.8           | 259.7                         | 4.0                          | 76.1  | 77.3 | 3.0  |
| HT102         | 148.5      | 7.2 | 21.6       | 1754       | 147.5            | 77.8             | 96.2            | 2.9            | 512.5                         | 326.6           | 97.4                          | 9.3                          | 105.3 | 56.9 | -5.0 |
| HT115         | 326.8      | 7.7 | 22.1       | 1461       | 89.8             | 87.5             | 84.3            | 9.0            | 494.2                         | 213.0           | 109.7                         | 14.8                         | 98.4  | 62.9 | -3.0 |
| HT116         | 264.3      | 7.9 | 22.1       | 3688       | 246.9            | 186.6            | 196.7           | 4.4            | 500.3                         | 894.6           | 340.8                         | 11.5                         | 176.8 | 20.0 | -6.0 |
| HT117         | 278.8      | 7.7 | 22.6       | 1131       | 51.3             | 89.4             | 75.4            | 5.6            | 506.4                         | 127.8           | 53.1                          | 15.3                         | 85.3  | 68.5 | 0.0  |
| HT118         | 259.8      | 8.1 | 21.6       | 668        | 62.5             | 20.4             | 45.0            | 5.1            | 207.5                         | 127.8           | 38.4                          | 2.3                          | 50.0  | 81.8 | -6.0 |
| HT119         | 276.4      | 8.3 | 21.6       | 3270       |                  |                  |                 |                |                               |                 |                               |                              |       |      | -    |
| HT120         | 175.2      | 7.1 | 21.1       | 1731       | 145.9            | 82.6             | 54.7            | 2.7            | 469.8                         | 326.6           | 114.6                         | 10.7                         | 101.9 | 62.2 | -8.0 |
|               | <b>Min</b> | 7.1 | 18.1       | 668        | 51.3             | 20.4             | 45.0            | 2.7            | 207.5                         | 113.6           | 38.4                          | 2.3                          | 50.0  | 20.0 | -8.0 |
|               | <b>Max</b> | 8.3 | 24.3       | 3688       | 246.9            | 186.6            | 196.7           | 9.0            | 549.1                         | 894.6           | 340.8                         | 15.3                         | 176.8 | 81.8 | 3.0  |
|               | <b>Moy</b> | 7.6 | 21.9285714 | 1803.57143 | 126.8            | 83.1             | 92.0            | 5.3            | 425.2                         | 302.6           | 152.0                         | 8.5                          | 100.1 | 59.2 | -3.8 |
| Campaign 2019 |            |     |            |            |                  |                  |                 |                |                               |                 |                               |                              |       |      |      |
| 163/52        | 153.5      | 7.3 | 22         | 1350       | 114.2            | 64.4             | 57.5            | 7.8            | 335.6                         | 120.5           | 235.4                         | 6.2                          | 84.8  | 73.0 | -1.0 |
| P9            | -          | 7.4 | 24         | 1735       | 180.4            | 89.9             | 103.5           | 3.9            | 573.6                         | 411.2           | 177.8                         | 6.2                          | 120.1 | 36.2 | -8.0 |
| HT24          | 117.4      | 7.9 | 18         | 1799       | 148.3            | 88.7             | 105.8           | 15.6           | 488.2                         | 287.1           | 182.6                         | 6.2                          | 114.5 | 56.3 | -1.0 |
| HT25          | -          | 7.2 | 23.5       | 1836       | 180.4            | 58.3             | 110.4           | 11.7           | 610.2                         | 255.2           | 110.5                         | 12.4                         | 119.3 | 47.2 | -2.0 |
| HT26          | -          | 7.4 | 24.6       | 1708       | 176.4            | 85.1             | 115.0           | 3.9            | 610.2                         | 382.9           | 187.4                         | 6.2                          | 121.6 | 35.3 | -8.0 |
| HT28          | -          | 7.3 | 24.8       | 1749       | 190.4            | 89.9             | 101.2           | 7.8            | 524.8                         | 382.9           | 230.6                         | 12.4                         | 122.5 | 37.8 | -6.0 |
| HT29          | -          | 8.1 | 21.4       | 1130       | 148.3            | 89.9             | 27.6            | 7.8            | 244.1                         | 170.2           | 374.8                         | 6.2                          | 88.0  | 64.6 | -2.0 |
| HT102         | 148.4      | 7.2 | 21.9       | 1601       | 180.4            | 99.7             | 98.9            | 7.8            | 659.0                         | 411.2           | 96.1                          | 12.4                         | 124.8 | 35.7 | -6.0 |

| Sample        | H          | pH    | T     | EC     | Ca <sup>2+</sup> | Mg <sup>2+</sup> | Na <sup>+</sup> | K <sup>+</sup> | HCO <sub>3</sub> <sup>-</sup> | Cl <sup>-</sup> | SO <sub>4</sub> <sup>2-</sup> | NO <sub>3</sub> <sup>-</sup> | WQI    | IWQI | BI   |
|---------------|------------|-------|-------|--------|------------------|------------------|-----------------|----------------|-------------------------------|-----------------|-------------------------------|------------------------------|--------|------|------|
|               |            |       | °C    | μS/cm  | mg/L             |                  |                 |                |                               |                 |                               |                              |        |      | %    |
| HT115         | 325.7      | 7.5   | 22.8  | 2405   | 176.4            | 109.4            | 48.3            | 3.9            | 512.6                         | 351.0           | 245.0                         | 18.6                         | 128.2  | 59.6 | -8.0 |
| HT117         | 277.2      | 7.7   | 22.8  | 1113   | 106.2            | 59.6             | 69.0            | 7.8            | 549.2                         | 148.9           | 72.1                          | 12.4                         | 93.0   | 60.2 | -6.0 |
| HT118         | 257.5      | 8.2   | 21.9  | 687    | 82.2             | 38.9             | 55.2            | 3.9            | 280.7                         | 205.6           | 43.2                          | 0.0                          | 60.4   | 75.9 | -7.0 |
| HT120         | 174.6      | 7.1   | 21.7  | 1589   | 180.4            | 96.0             | 64.4            | 3.9            | 598.0                         | 354.5           | 158.5                         | 6.2                          | 116.1  | 41.1 | -8.0 |
|               | <b>Min</b> | 7.1   | 18    | 687    | 82.2             | 38.9             | 27.6            | 3.9            | 244.1                         | 120.5           | 43.2                          | 0.0                          | 60.4   |      | -8.0 |
|               | <b>Max</b> | 8.2   | 24.8  | 2405   | 190.4            | 109.4            | 115.0           | 15.6           | 659.0                         | 411.2           | 374.8                         | 18.6                         | 128.2  |      | -1.0 |
|               | <b>Moy</b> | 7.525 | 22.45 | 1558.5 | 155.3            | 80.8             | 79.7            | 7.2            | 498.8                         | 290.1           | 176.2                         | 8.8                          | 107.8  |      | -5.3 |
| Campaign 2020 |            |       |       |        |                  |                  |                 |                |                               |                 |                               |                              |        |      |      |
| HT123         | -          | 7.3   | 23    | 2993   | 192.3            | 125.0            | 263.8           | 3.3            | 414.8                         | 657.5           | 343.0                         | 72.1                         | 167.9  | 22.7 | -3.0 |
| HT55          | 36.7       | 7.6   | 22.1  | 2505   | 168.7            | 46.4             | 301.6           | 2.1            | 302.6                         | 661.7           | 87.3                          | 40.0                         | 126.8  | 22.4 | -1.0 |
| HT54          | 62.4       | 7.5   | 22.3  | 1891   | 96.8             | 63.1             | 203.6           | 1.5            | 407.5                         | 378.0           | 199.0                         | 27.3                         | 110.5  | 42.1 | -7.0 |
| HT56          | 0.8        | 7.2   | 21.5  | 5285   | 340.4            | 84.3             | 614.3           | 214.6          | 429.4                         | 1090.3          | 237.6                         | 940.5                        | 600.0  |      | -2.0 |
| E70           | 0.93       | 7.1   | 22.4  | 1407   | 141.9            | 46.3             | 100.0           | 5.3            | 353.8                         | 207.7           | 116.0                         | 14.5                         | 87.9   | 65.1 | 4.0  |
| E71           | 89.5       | 7.7   | 22.2  | 4094   | 128.3            | 58.9             | 682.6           | 24.2           | 280.6                         | 1079.9          | 218.0                         | 226.8                        | 243.0  |      | -2.0 |
| E72           | 46         | 7.6   | 24.5  | 2224   | 159.8            | 67.0             | 197.9           | 5.4            | 407.5                         | 438.9           | 246.4                         | 5.5                          | 118.8  | 41.1 | -4.0 |
| E73           | 47         | 7.4   | 29.2  | 2340   | 144.8            | 70.2             | 210.6           | 4.8            | 409.9                         | 487.2           | 213.6                         | 0.3                          | 117.7  | 31.2 | -6.0 |
| E74           | 4          | 8.5   | 27    | 27000  | 341.1            | 817.5            | 7117.6          | 231.0          | 178.1                         | 11574.5         | 2320.0                        | 3.5                          | 1244.1 |      | 3.0  |
| E75           | 2.5        | 6.6   | 24.1  | 1981   | 125.7            | 59.6             | 168.0           | 6.4            | 341.6                         | 344.4           | 175.0                         | 0.8                          | 98.3   | 57.8 | -1.0 |
| E76           | 250        | 8.05  | 27.7  | 1862   | 92.2             | 25.6             | 219.0           | 2.5            | 214.7                         | 375.5           | 196.8                         | 53.5                         | 103.5  | 36.8 | -8.0 |
| HT120         | 174.4      | 7.2   | 25    | 1541   | 151.1            | 58.9             | 90.5            | 3.6            | 419.7                         | 247.5           | 142.5                         | 8.5                          | 95.4   | 62.4 | -2.0 |
| HT26          | 135        | 7.2   | 25    | 1579   | 127.2            | 60.1             | 102.8           | 3.4            | 444.1                         | 248.9           | 147.8                         | 3.4                          | 94.7   | 59.4 | -5.0 |
| P9            | 143        | 7.3   | 25.7  | 1635   | 130.5            | 71.3             | 112.9           | 4.4            | 424.6                         | 251.9           | 128.8                         | 4.6                          | 95.5   | 58.7 | 2.0  |
| HT102         | 148.1      | 7.5   | 24    | 1551   | 139.2            | 59.3             | 111.1           | 3.1            | 475.8                         | 243.5           | 149.8                         | 12.3                         | 100.7  | 59.6 | -4.0 |
| HT25          | 148        | 7.4   | 26.5  | 1812   | 168.6            | 75.6             | 138.0           | 5.7            | 505.1                         | 324.5           | 180.7                         | 15.3                         | 116.2  | 59.9 | -2.0 |
| HT24          | 117        | 8.2   | 25    | 1837   | 104.5            | 84.7             | 148.5           | 8.4            | 510.0                         | 324.0           | 194.1                         | 0.2                          | 111.1  | 57.8 | -7.0 |

| Sample | H          | pH   | T    | EC    | Ca <sup>2+</sup> | Mg <sup>2+</sup> | Na <sup>+</sup> | K <sup>+</sup> | HCO <sub>3</sub> <sup>-</sup> | Cl <sup>-</sup> | SO <sub>4</sub> <sup>2-</sup> | NO <sub>3</sub> <sup>-</sup> | WQI    | IWQI | BI   |
|--------|------------|------|------|-------|------------------|------------------|-----------------|----------------|-------------------------------|-----------------|-------------------------------|------------------------------|--------|------|------|
|        |            |      | °C   | μS/cm | mg/L             |                  |                 |                |                               |                 |                               |                              |        |      | %    |
| E83    | 163        | 8.12 | 32   | 867   | 60.7             | 32.9             | 39.4            | 5.1            | 200.1                         | 51.7            | 180.4                         | 0.3                          | 55.9   | 69.3 | -6.0 |
| 163/52 | 155.1      | -    | -    | -     | -                | -                | -               | -              | -                             | -               | -                             | -                            |        |      | -    |
| HT29   | 195        | 8.2  | 24   | 1050  | 106.2            | 41.3             | 39.2            | 5.0            | 231.8                         | 52.3            | 245.4                         | 0.3                          | 67.5   | 67.3 | 1.0  |
| HT115  | 324.8      | 7.9  | 24   | 1896  | 96.6             | 95.7             | 166.3           | 9.9            | 475.8                         | 314.7           | 155.2                         | 6.0                          | 109.8  | 56.4 | 0.0  |
| HT117  | 275.2      | 7.7  | 24.3 | 1161  | 108.5            | 62.9             | 81.6            | 2.8            | 507.5                         | 106.2           | 90.8                          | 14.8                         | 94.5   | 68.4 | 3.0  |
| HT118  | 261.35     | 8.1  | 24   | 481   | 81.9             | 36.6             | 59.9            | 4.3            | 265.5                         | 215.0           | 66.0                          | 2.8                          | 59.1   | 76.5 | -9.0 |
|        | <b>Min</b> | 6.6  | 21.5 | 481   | 60.7             | 25.6             | 39.2            | 1.5            | 178.1                         | 51.7            | 66.0                          | 0.2                          | 55.9   | 22.4 | -9.0 |
|        | <b>Max</b> | 8.5  | 32   | 27000 | 341.1            | 817.5            | 7117.6          | 231.0          | 510.0                         | 11574.5         | 2320.0                        | 940.5                        | 1244.1 | 76.5 | 4.0  |
|        | <b>Moy</b> | 7.6  | 24.8 | 3136  | 145.8            | 97.4             | 507.7           | 25.3           | 372.7                         | 894.4           | 274.3                         | 66.1                         | 182.7  | 53.4 | -2.5 |
